# Supplementary material for: Biogenic Synthesis of Silver-Core Selenium-Shell Nanoparticles Using Ocimum tenuiflorum L.: Response Surface Methodology-Based Optimization and Biological Activity
Source: MDPI journal article supplement (doi:10.3390/nano11102516), 2021-09-27
Supplement: s1 [file s1]

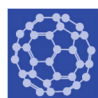

Supplementary Material

# Biogenic Synthesis of Silver-Core Selenium-Shell Nanoparticles Using *Ocimum tenuiflorum* L.: Response Surface Methodology-Based Optimization and Biological Activity

Femi Olawale, Mario Ariatti and Moganavelli Singh \*

Nano-Gene and Drug Delivery Group, Discipline of Biochemistry, School of Life Sciences, College of Agriculture, Engineering and Science, University of KwaZulu-Natal, Private Bag X54001, Durban, 4000, South Africa; 219094535@stu.ukzn.ac.za (F.O.); ariattim@ukzn.ac.za (M.A.)

\* Correspondence: singhm1@ukzn.ac.za; Tel.: +2731-2607170

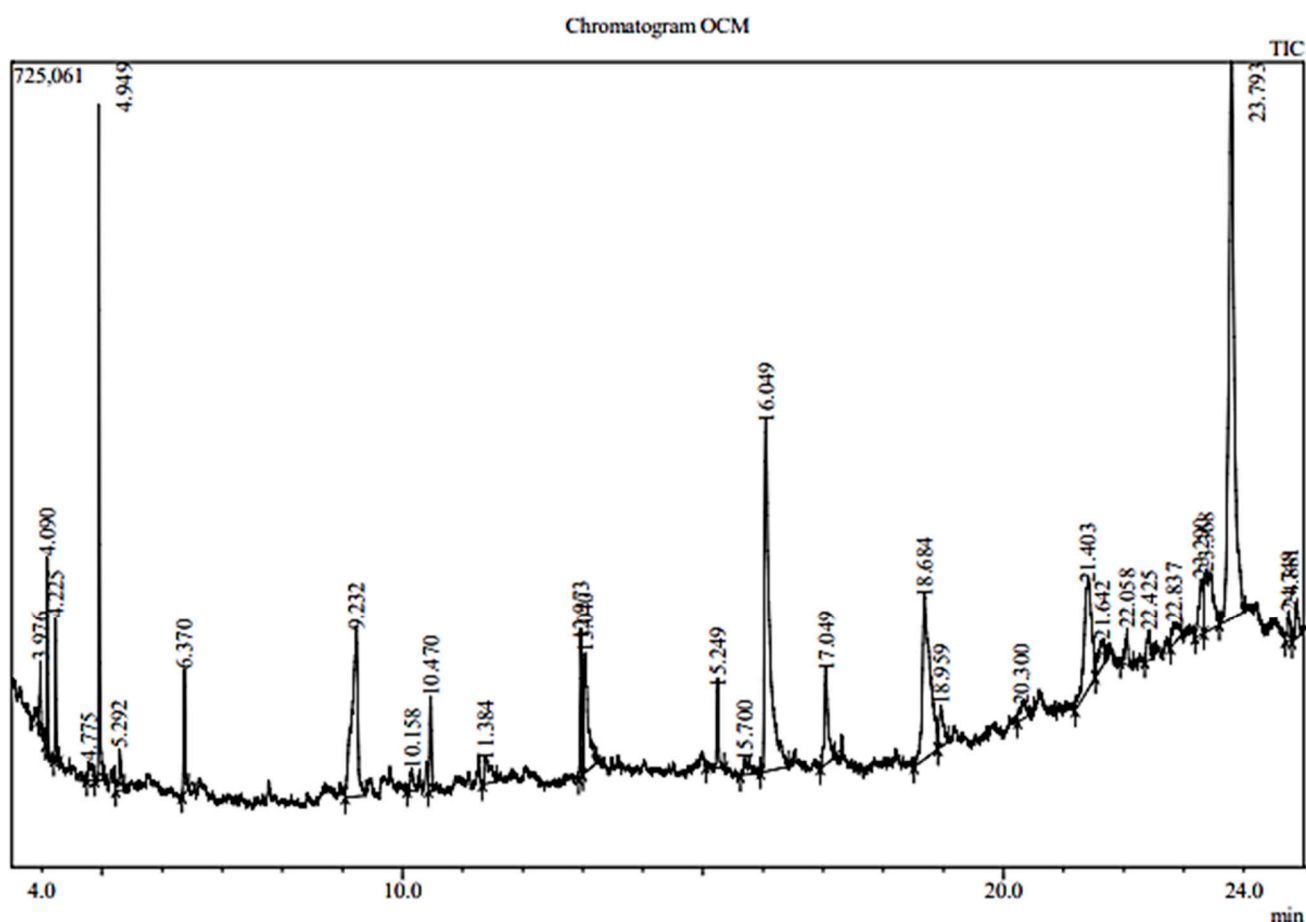

Figure S1. GCMS chromatogram of phytoconstituents of *Ocimum tenuiflorum* inflorescence aqueous extract.

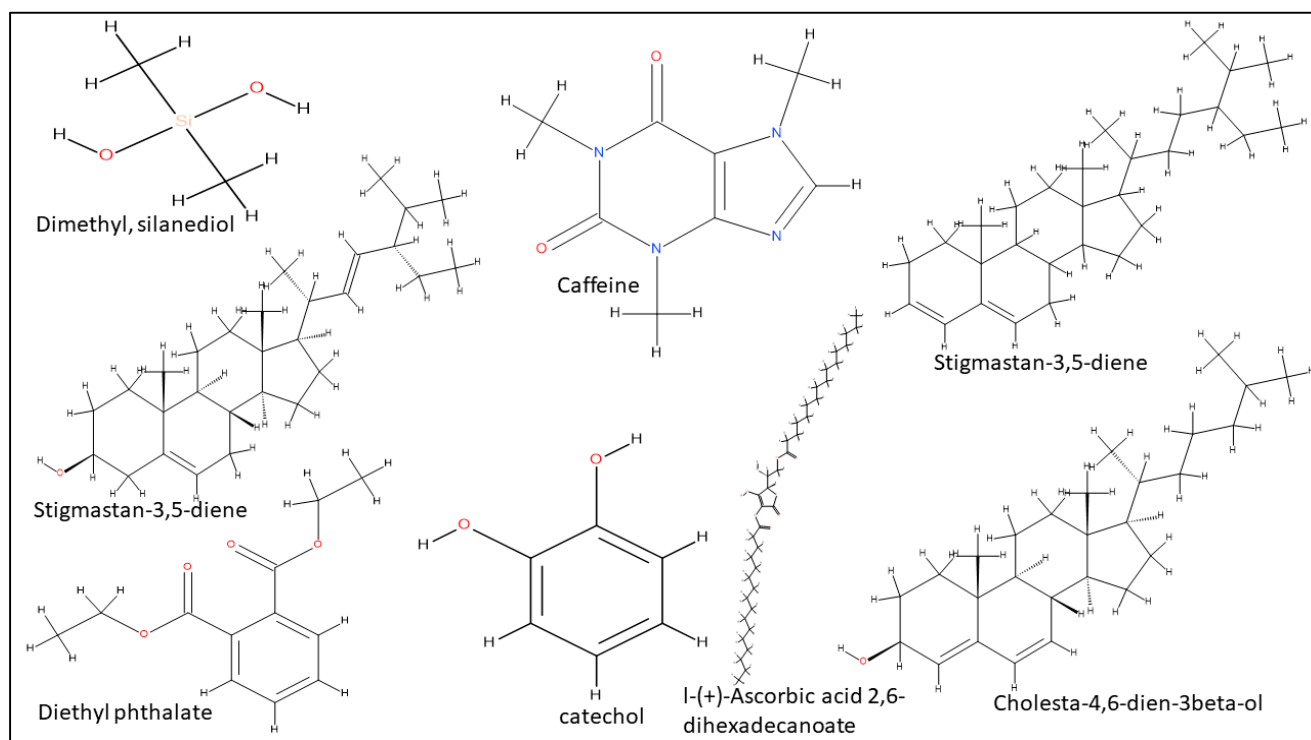

**Figure S2.** 2-Dimensional structure of tentatively identified compounds from *Ocimum tenuiflorum* inflorescence aqueous extract.

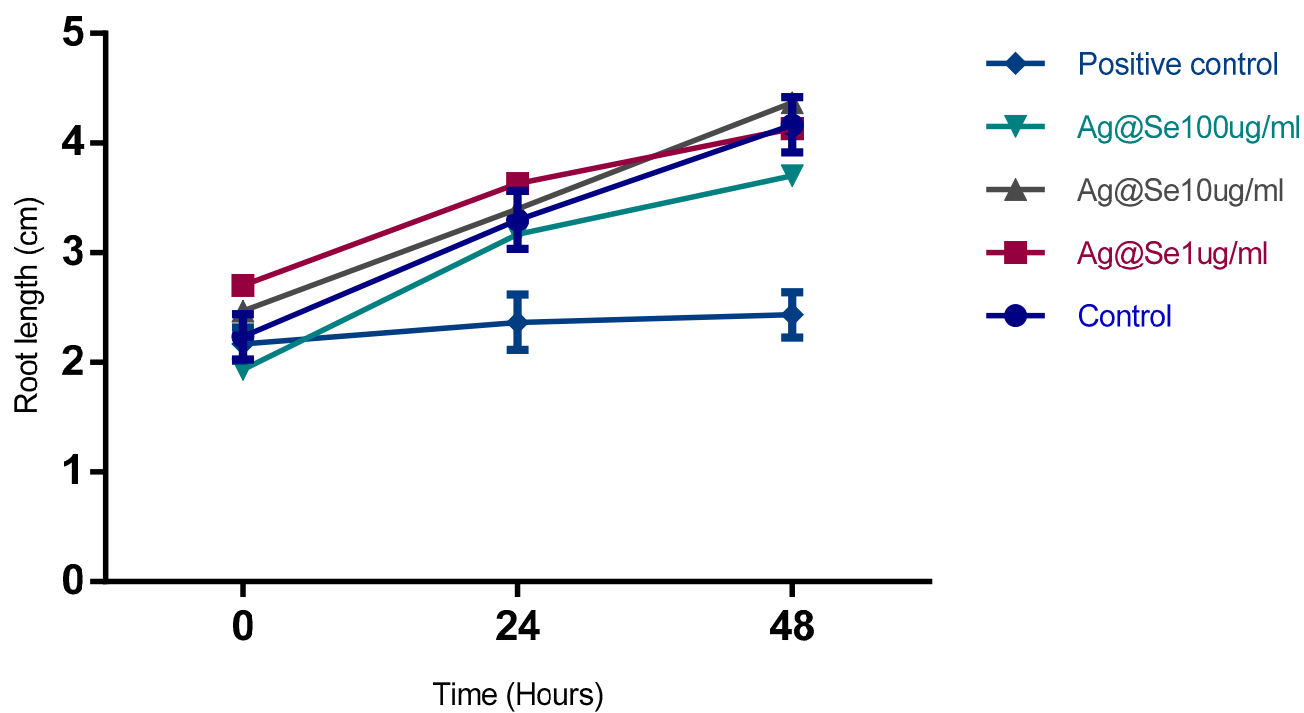

**Figure S3.** Mean root length of *Allium cepa* exposed to Ag@Se nanoparticles for 48 hours.

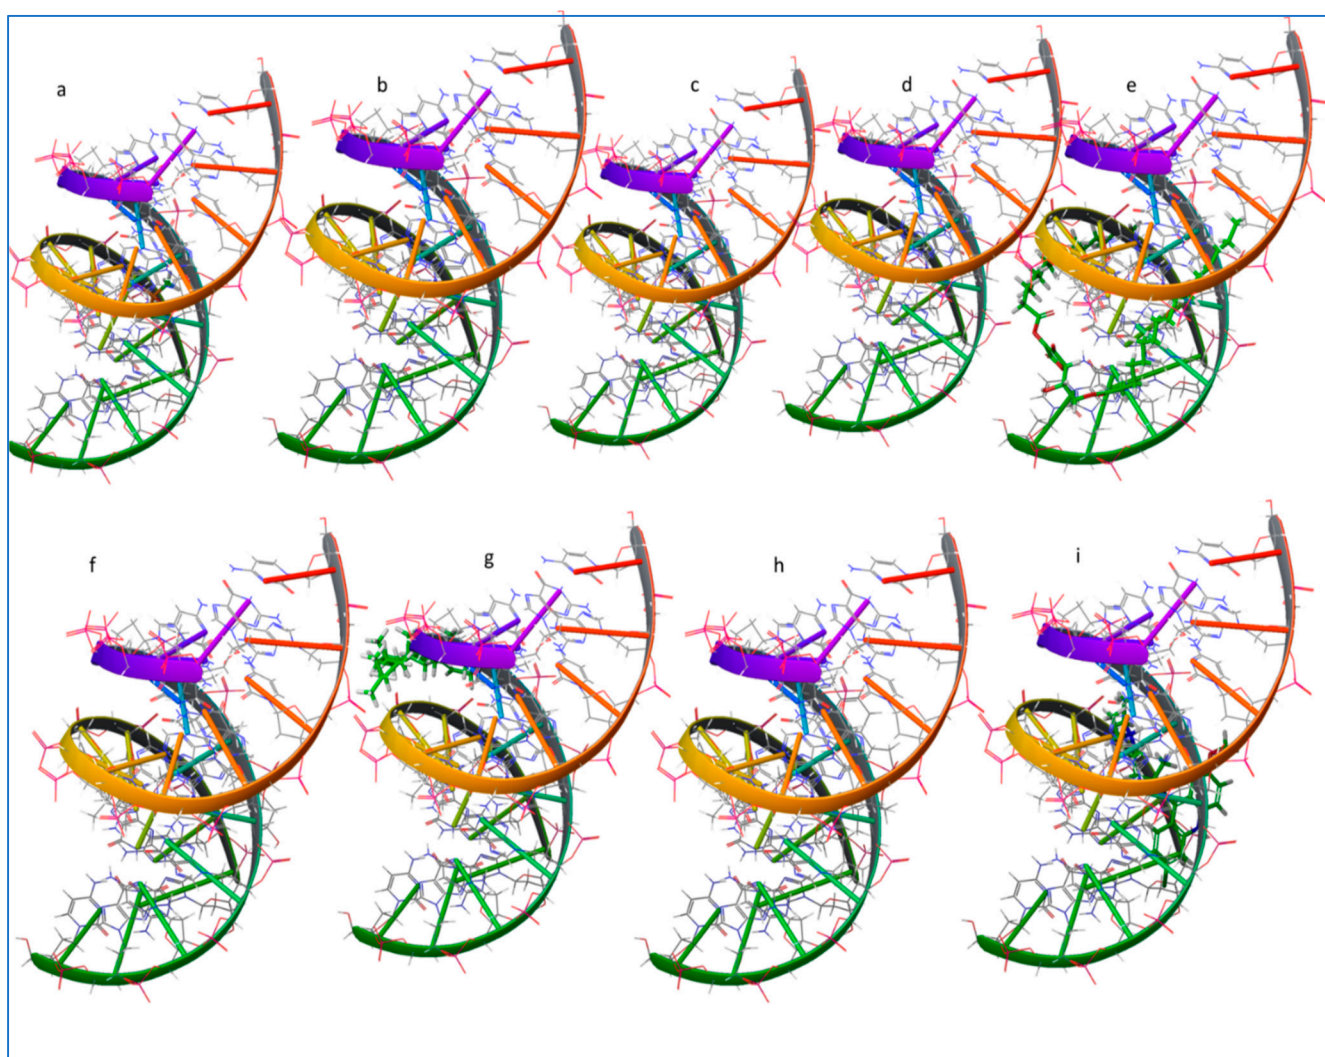

**Figure S4.** 3-Dimensional ligand interaction diagram of dimethyl silanediol (a), catechol (b), diethyl phthalate (c), caffeine (d), l-(+)-ascorbic acid 2,6-dihexadecanoate (e), stigmasterol (f), cholesta-4,6-dien-3beta-ol (g) stigmasteran-3,5-diene (h) and quinacrine (i) with B-DNA.

**Supplementary Table S1.** Analysis of variance values and model parameters showing the effect of the amount of extract and temperature on zeta potential, hydrodynamic size and nanoparticle concentration.

| Zeta potential          |    |         |         |         |         |
|-------------------------|----|---------|---------|---------|---------|
| Source                  | DF | Adj SS  | Adj MS  | F-Value | P-Value |
| Model                   | 5  | 132.320 | 26.4640 | 4.16    | 0.045   |
| Linear                  | 2  | 17.020  | 8.5099  | 1.34    | 0.322   |
| EXTRACT                 | 1  | 0.035   | 0.0345  | 0.01    | 0.943   |
| TEMPERATURE             | 1  | 16.985  | 16.9853 | 2.67    | 0.146   |
| Square                  | 2  | 23.140  | 11.5702 | 1.82    | 0.231   |
| EXTRACT*EXTRACT         | 1  | 14.027  | 14.0271 | 2.20    | 0.181   |
| TEMPERATURE*TEMPERATURE | 1  | 12.121  | 12.1210 | 1.90    | 0.210   |
| 2-Way Interaction       | 1  | 92.160  | 92.1600 | 14.48   | 0.007   |
| EXTRACT*TEMPERATURE     | 1  | 92.160  | 92.1600 | 14.48   | 0.007   |
| Error                   | 7  | 44.552  | 6.3646  |         |         |
| Lack-of-Fit             | 3  | 14.220  | 4.7401  | 0.63    | 0.636   |
| Pure Error              | 4  | 30.332  | 7.5830  |         |         |

|                         |                                                        |         |         |         |         |
|-------------------------|--------------------------------------------------------|---------|---------|---------|---------|
| Total                   | 12                                                     | 176.872 |         |         |         |
| Model summary           | R <sup>2</sup> = 74.81% , R <sup>2</sup> (adj)= 56.82% |         |         |         |         |
| Hydrodynamic size       |                                                        |         |         |         |         |
| Source                  | DF                                                     | Adj SS  | Adj MS  | F-Value | P-Value |
| Model                   | 5                                                      | 1076.38 | 215.276 | 2.91    | 0.098   |
| Linear                  | 2                                                      | 1054.50 | 527.250 | 7.12    | 0.021   |
| EXTRACT                 | 1                                                      | 142.59  | 142.590 | 1.93    | 0.208   |
| TEMPERATURE             | 1                                                      | 911.91  | 911.910 | 12.32   | 0.010   |
| Square                  | 2                                                      | 12.58   | 6.289   | 0.08    | 0.919   |
| EXTRACT*EXTRACT         | 1                                                      | 7.63    | 7.633   | 0.10    | 0.758   |
| TEMPERATURE*TEMPERATURE | 1                                                      | 6.58    | 6.579   | 0.09    | 0.774   |
| 2-Way Interaction       | 1                                                      | 9.30    | 9.303   | 0.13    | 0.733   |
| EXTRACT*TEMPERATURE     | 1                                                      | 9.30    | 9.303   | 0.13    | 0.733   |
| Error                   | 7                                                      | 518.20  | 74.029  |         |         |
| Lack-of-Fit             | 3                                                      | 475.86  | 158.618 | 14.98   | 0.012   |
| Pure Error              | 4                                                      | 42.35   | 10.587  |         |         |
| Total                   | 12                                                     | 1594.58 |         |         |         |
| Model summary           | R <sup>2</sup> = 67.50% , R <sup>2</sup> (adj)= 44.29% |         |         |         |         |
| Concentration           |                                                        |         |         |         |         |
| Source                  | DF                                                     | Adj SS  | Adj MS  | F-Value | P-Value |
| Model                   | 5                                                      | 89.2926 | 17.8585 | 35.14   | 0.000   |
| Linear                  | 2                                                      | 83.4795 | 41.7398 | 82.13   | 0.000   |
| EXTRACT                 | 1                                                      | 7.6414  | 7.6414  | 15.04   | 0.006   |
| TEMPERATURE             | 1                                                      | 75.8382 | 75.8382 | 149.23  | 0.000   |
| Square                  | 2                                                      | 3.8601  | 1.9300  | 3.80    | 0.076   |
| EXTRACT*EXTRACT         | 1                                                      | 3.3138  | 3.3138  | 6.52    | 0.038   |
| TEMPERATURE*TEMPERATURE | 1                                                      | 0.2454  | 0.2454  | 0.48    | 0.510   |
| 2-Way Interaction       | 1                                                      | 1.9530  | 1.9530  | 3.84    | 0.091   |
| EXTRACT*TEMPERATURE     | 1                                                      | 1.9530  | 1.9530  | 3.84    | 0.091   |
| Error                   | 7                                                      | 3.5574  | 0.5082  |         |         |
| Lack-of-Fit             | 3                                                      | 3.4808  | 1.1603  | 60.57   | 0.001   |
| Pure Error              | 4                                                      | 0.0766  | 0.0192  |         |         |
| Total                   | 12                                                     | 92.8500 |         |         |         |
| Model summary           | R <sup>2</sup> = 96.17% , R <sup>2</sup> (adj)= 93.43% |         |         |         |         |
